# Supplementary material for: Investigating the Nutritional and Recovery Habits of Tennis Players
Source: MDPI journal article supplement (doi:10.3390/nu10040443), 2018-04-03
Supplement: s1 [file s1]

## **Nutrition Habits Questionnaire**

*Please complete the following questionnaire honestly. Give as much detail as possible regarding types of foods eaten and stipulate what 'other' is, if and when it applies.*

***Are you?***

Male

Female

***How old are you?***

***What is your current playing standard?***

County Level

Regional Level

Professional Level

*Please give further detail below (i.e. current club, rating, UTR and or ranking)*

***What do you typically eat and drink on the day before competition?***

***What does a typical pre-match meal (including fluids) consist of?***

***What do you typically eat and drink prior to a morning match (~9am start)?***

***What do you typically eat and drink on the day of a match (midday start)?***

*What do you typically eat and drink on the day of a match (afternoon ~2-3pm start)?*

*What do you typically eat and drink on the day of a match (evening ~6-7pm start)?*

*What do you typically eat or drink during a match?*

- |                                     |                          |
|-------------------------------------|--------------------------|
| Banana(s)                           | <input type="checkbox"/> |
| Energy Gels                         | <input type="checkbox"/> |
| Sugary Sweets (Candy)               | <input type="checkbox"/> |
| Chocolate                           | <input type="checkbox"/> |
| Jaffa Cakes                         | <input type="checkbox"/> |
| Water                               | <input type="checkbox"/> |
| Sports Drinks (e.g. Lucozade sport) | <input type="checkbox"/> |
| Juice/Squash                        | <input type="checkbox"/> |
| Other...                            | <input type="checkbox"/> |

*Please give details of the quantity consumed during a match, and the brand name, for the foods and or drinks selected in the previous question (e.g. 2 x SIS energy gels and 4 x McVities Jaffa cakes)*

*How do you gauge how much fluid to consume during a match?*

- |                                 |                          |
|---------------------------------|--------------------------|
| By the number of games complete | <input type="checkbox"/> |
| At the change of ends           | <input type="checkbox"/> |
| At the end of a set             | <input type="checkbox"/> |
| At the end of a match           | <input type="checkbox"/> |
| Time Passed                     | <input type="checkbox"/> |

Ad-libitum consumption according to thirst

Other...

*Please provide reasons below for your choices*

*Do you specifically target a certain volume of fluid during a match?*

Yes

No

*If yes please specify quantity below. If no, please leave this question blank*

500ml

500ml – 1L

>2L

Other...

*What considerations do you make for a long match (>2 hours in duration)? Nutritional or otherwise?*

Energy Gels

Sports Drink

Sugary Sweets (Candy)

Cold/Wet Towel

Other...

*Are there any specific recovery strategies you implement? Nutritional or otherwise?*

Ice Bath

Hot Bath

Compression Garments

- Foam Rolling
- Protein Shakes
- Cherry Juice
- Creatine
- Other...

*Please choose the predominant reason for using the recovery strategies (if applicable).*

|                      | Scientific Literature    | Peers, Coach, Friend Influence | Saves Time               | Saves Money              | Easily Available         | Personal Preference      |
|----------------------|--------------------------|--------------------------------|--------------------------|--------------------------|--------------------------|--------------------------|
| Ice Bath             | <input type="checkbox"/> | <input type="checkbox"/>       | <input type="checkbox"/> | <input type="checkbox"/> | <input type="checkbox"/> | <input type="checkbox"/> |
| Hot Bath             | <input type="checkbox"/> | <input type="checkbox"/>       | <input type="checkbox"/> | <input type="checkbox"/> | <input type="checkbox"/> | <input type="checkbox"/> |
| Compression Garments | <input type="checkbox"/> | <input type="checkbox"/>       | <input type="checkbox"/> | <input type="checkbox"/> | <input type="checkbox"/> | <input type="checkbox"/> |
| Foam Rolling         | <input type="checkbox"/> | <input type="checkbox"/>       | <input type="checkbox"/> | <input type="checkbox"/> | <input type="checkbox"/> | <input type="checkbox"/> |
| Protein Shakes       | <input type="checkbox"/> | <input type="checkbox"/>       | <input type="checkbox"/> | <input type="checkbox"/> | <input type="checkbox"/> | <input type="checkbox"/> |
| Cherry Juice         | <input type="checkbox"/> | <input type="checkbox"/>       | <input type="checkbox"/> | <input type="checkbox"/> | <input type="checkbox"/> | <input type="checkbox"/> |
| Creatine             | <input type="checkbox"/> | <input type="checkbox"/>       | <input type="checkbox"/> | <input type="checkbox"/> | <input type="checkbox"/> | <input type="checkbox"/> |
| Other                | <input type="checkbox"/> | <input type="checkbox"/>       | <input type="checkbox"/> | <input type="checkbox"/> | <input type="checkbox"/> | <input type="checkbox"/> |

*What do you typically eat or drink immediately post-match for recovery (within 0-60 minutes)?*

*What do you typically eat or drink within three hours' post-match for recovery?*

*What do you typically eat or drink before bed post-match for recovery? (i.e., the same night as the match)*

*What do you typically eat or drink the day after a match for recovery?*

*Do you change your eating habits when playing on a clay court?*

Yes

No

*If yes, what do you change and why?*

*Do you change your eating habits when playing on a hard/tarmac/acrylic court?*

Yes

No

*If yes, what do you change and why?*

*Do you change your eating habits when playing on a grass court?*

Yes

No

*If yes, what do you change and why?*

**END**

Thank you for taking the time to complete this questionnaire.
